# Supplementary material for: Role of Intraspecies Recombination in the Spread of Pathogenicity Islands within the Escherichia coli Species
Source: PubMed Central journal article supplement (PMC2606025; doi:10.1371/journal.ppat.1000257), 2009-01-09

# ECOR

HPI negative

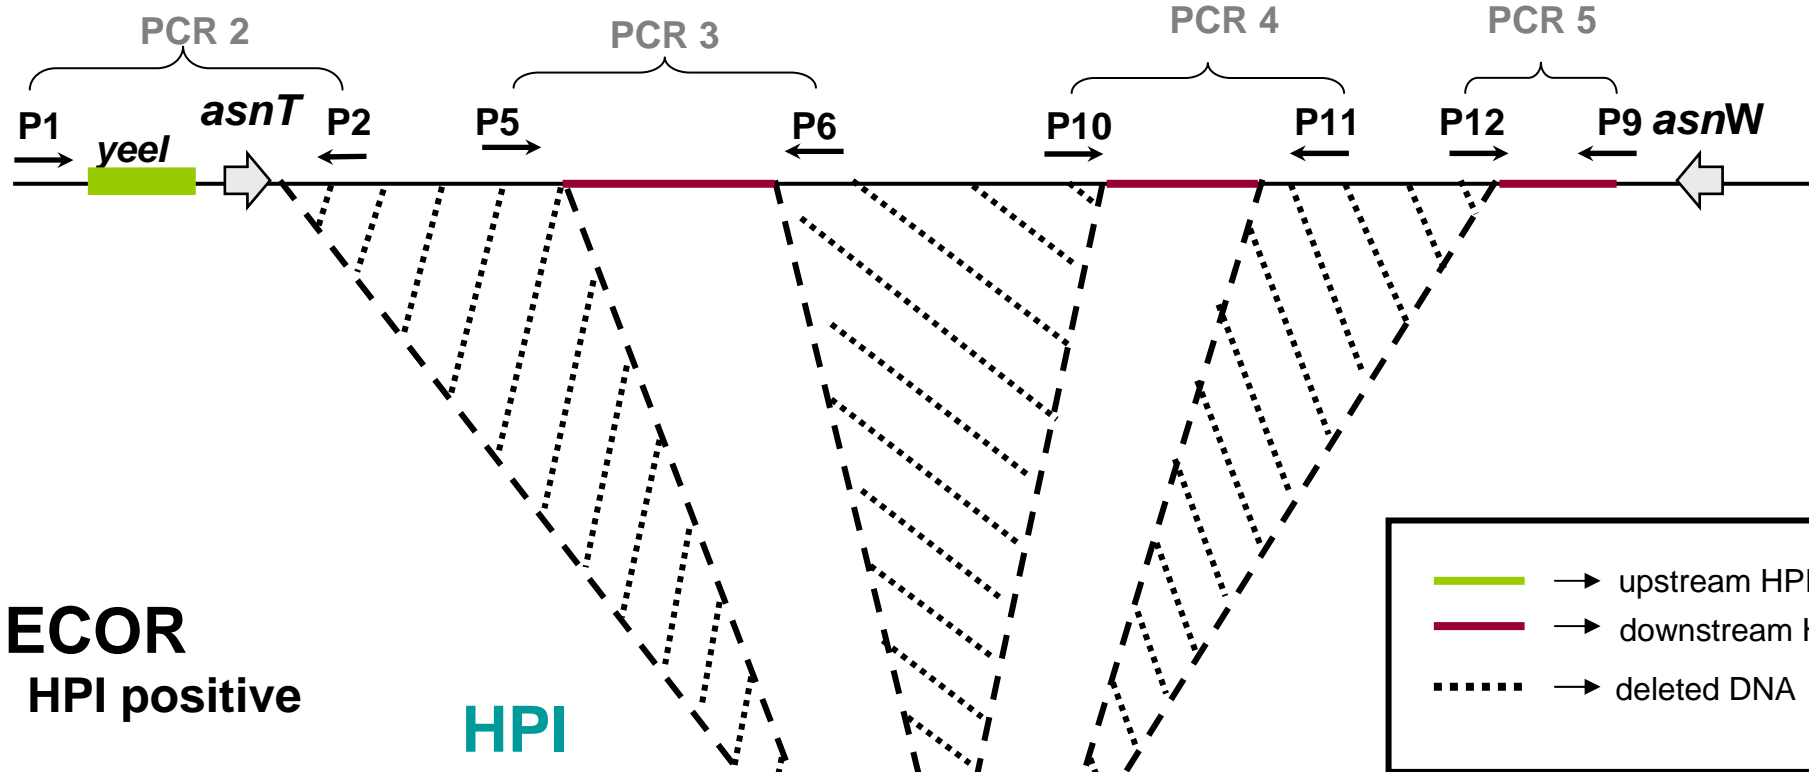

# ECOR

HPI positive

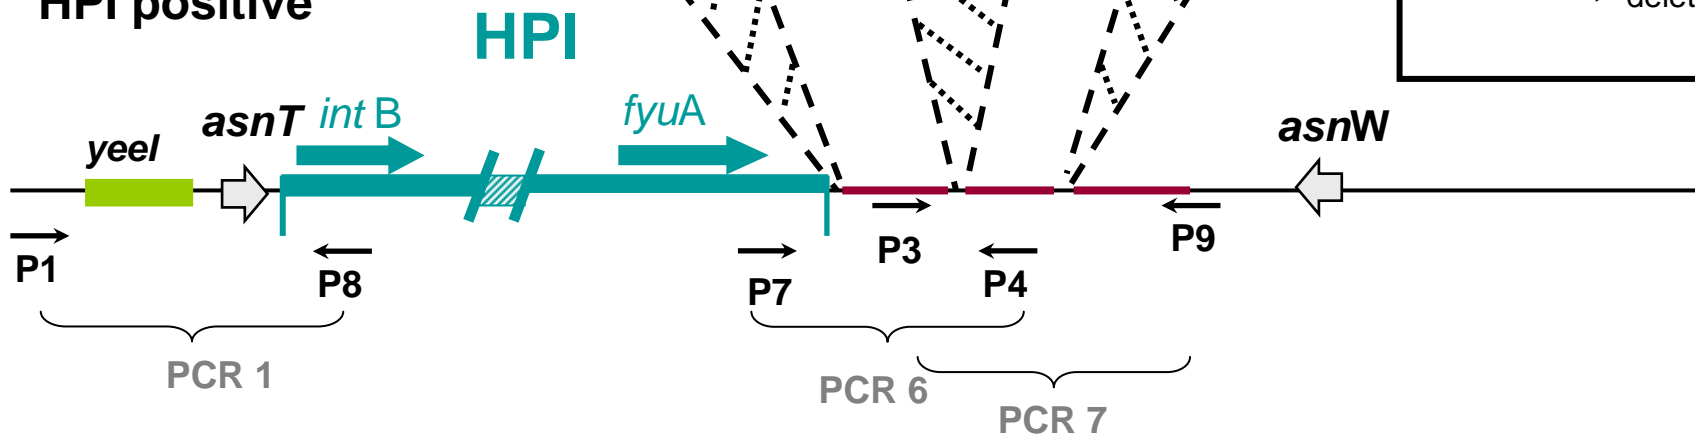

Supplement: ppat.1000257.s002.pdf [file ppat.1000257.s002.pdf]
