# Supplementary material for: Role of Intraspecies Recombination in the Spread of Pathogenicity Islands within the Escherichia coli Species
Source: PubMed Central journal article supplement (PMC2606025; doi:10.1371/journal.ppat.1000257), 2009-01-09
Supplement: ppat.1000257.s005.pdf [file ppat.1000257.s005.pdf]

**Table S1.** Oligonucleotide primers used in this study

| locus                   | PCR / gene  | forward-primer | sequence                                | reverse-primer | sequence                      | fragment length |
|-------------------------|-------------|----------------|-----------------------------------------|----------------|-------------------------------|-----------------|
| <b>HPI-MLST PCRs</b>    |             |                |                                         |                |                               |                 |
|                         | <i>intB</i> | intB.for       | 5'-CCAGTCAGAGGAGCCAATTTT-3'             | intB.rev       | 5'-CCGGGAGAAATTAGCGAGCAT-3'   | 1,7 kb          |
|                         | <i>ybtQ</i> | ybtQ.for       | 5'-GCGGCAGGGCGGGTCAAATGA-3'             | ybtQ.rev       | 5'-TGCGACGGGAAGCGGTGCTAT-3'   | 650 bp          |
|                         | <i>ybtA</i> | ybtA.for       | 5'-GCCATAGCTAAAATAACCTTCCT-3'           | ybtA.rev       | 5'-CCGGTAACAGCGAATCCTGAGAT-3' | 1,5 kb          |
|                         | <i>irp2</i> | irp2.for       | 5'-CTCCGCAGAACAGGTAGCCGA-3'             | irp2.rev       | 5'-GCCAGATAATGTCCGCCGAGT-3'   | 637 bp          |
|                         | <i>irp1</i> | irp1.for       | 5'-CCATCTACAGGCGGCTACGTC-3'             | irp1.rev       | 5'-GTCTCCCGGCGGCATACACCA-3'   | 654 bp          |
|                         | <i>fyuA</i> | fyuA.for       | 5'-CTACGACATGCCGACAATGCC-3'             | fyuA.rev       | 5'-TGCTTCCCGCGCCATAACGTG-3'   | 670 bp          |
|                         |             |                |                                         |                |                               |                 |
|                         |             |                |                                         |                |                               |                 |
| <b>„upstream HPI“</b>   |             |                |                                         |                |                               |                 |
| in HPI-positive strains | <b>1</b>    | P1             | 5'-GGAAGTCGGGAGATAAGTCATTGATAAAGTGGC-3' | P8             | 5'-CCAATTTTCCCGATGCGTAG-3'    | 1,3 kb          |
| in HPI-negative strains | <b>2</b>    | P1             | 5'-GGAAGTCGGGAGATAAGTCATTGATAAAGTGGC-3' | P2             | 5'-GGCCGATTCCAACGCTCCAAG-3'   | 1,2 kb          |
|                         |             |                |                                         |                |                               |                 |
|                         |             |                |                                         |                |                               |                 |
| <b>“downstream HPI”</b> |             |                |                                         |                |                               |                 |
| in HPI-negative strains | <b>3</b>    | P5             | 5'-GCGGCAGCACAAAGGTGTGGTAAA-3'          | P6             | 5'-CTAAGCCGTTGTTAATCTGCGTA-3' | 600 bp          |
|                         | <b>4</b>    | P10            | 5'-ACCAACCACGACGGCAATTTTAA-3'           | P11            | 5'-AACCGCCTTGTCGAGAGTAAAG-3'  | 600 bp          |
|                         | <b>5</b>    | P12            | 5'-ACTTTGATTGCCGATGCTGGTAC-3'           | P9             | 5'-CATGGTGACCTCGGCTACTCCCT-3' | 650 bp          |
|                         |             |                |                                         |                |                               |                 |
| <b>“downstream HPI”</b> |             |                |                                         |                |                               |                 |
| in HPI-positive strains | <b>6</b>    | P7             | 5'-TGGCAACATCCTACTATCGGTC-3'            | P4             | 5'-GACGTTCCGGCACATAGGTCA-3'   |                 |
|                         | <b>7</b>    | P3             | 5'-CACGTGGATGGGCCTCTTCTCAG-3'           | P9             | 5'-CATGGTGACCTCGGCTACTCCCT-3' | 1 kb            |
