# Supplementary material for: Role of Intraspecies Recombination in the Spread of Pathogenicity Islands within the Escherichia coli Species
Source: PubMed Central journal article supplement (PMC2606025; doi:10.1371/journal.ppat.1000257), 2009-01-09
Supplement: ppat.1000257.s006.pdf [file ppat.1000257.s006.pdf]

**Table S2.** Main characteristics of the *E. coli* genes studied

| Genes       | Number of nucleotides | HPI positive strains |                                           | HPI negative strains |                                           |
|-------------|-----------------------|----------------------|-------------------------------------------|----------------------|-------------------------------------------|
|             |                       | Number of strains    | Number of informative sites for parsimony | Number of strains    | Number of informative sites for parsimony |
| <i>icd</i>  | 1166                  | 37                   | 68                                        | 13                   | 25                                        |
| <i>putP</i> | 892                   | 37                   | 88                                        | 13                   | 52                                        |
| <i>polB</i> | 995                   | 37                   | 96                                        | 13                   | 39                                        |
| <i>trpA</i> | 727                   | 37                   | 60                                        | 13                   | 16                                        |
| <i>trpB</i> | 1138                  | 37                   | 83                                        | 13                   | 35                                        |
| <i>pabB</i> | 1003                  | 37                   | 59                                        | 13                   | 7                                         |
| Strain MLST | 5919                  | 37                   | 454                                       | 13                   | 174                                       |
| <i>int</i>  | 789                   | 37                   | 8                                         |                      |                                           |
| <i>ybtQ</i> | 594                   | 37                   | 1                                         |                      |                                           |
| <i>ybtA</i> | 957                   | 37                   | 7                                         |                      |                                           |
| <i>irp2</i> | 585                   | 37                   | 6                                         |                      |                                           |
| <i>irp1</i> | 594                   | 37                   | 9                                         |                      |                                           |
| <i>fuyA</i> | 600                   | 37                   | 3                                         |                      |                                           |
| HPI MLST    | 4119                  | 37                   | 34                                        |                      |                                           |
| UR          | 837                   | 37                   | 19                                        | 13                   | 3                                         |
| DR          | 1162                  | 30                   | 12                                        | 13                   | 63                                        |
