# Supplementary material for: Role of Intraspecies Recombination in the Spread of Pathogenicity Islands within the Escherichia coli Species
Source: PubMed Central journal article supplement (PMC2606025; doi:10.1371/journal.ppat.1000257), 2009-01-09
Supplement: ppat.1000257.s007.pdf [file ppat.1000257.s007.pdf]

**Table S3:** Likelihood estimation of the parameters carried out with PHYML (Guidon and Gascuel, 2003). For each sequence, the most parsimonious model is selected following the Akaike criterium. Upper part: base frequencies. Lower part: substitution rates (tv: transversion; ti transition), G parameter of the Gamma distribution of the heterogeneity of substitution rates among sites (eight discrete classes), and proportion of invariant sites, p-inv.

|                    |                    | <b>A</b>                       | <b>C</b>  | <b>G</b>  | <b>T</b>  |           |           |              |          |  |
|--------------------|--------------------|--------------------------------|-----------|-----------|-----------|-----------|-----------|--------------|----------|--|
|                    | <b>6 genes (1)</b> | 0,227                          | 0,257     | 0,281     | 0,235     |           |           |              |          |  |
|                    | <i>icd</i>         | 0,250                          | 0,250     | 0,250     | 0,250     |           |           |              |          |  |
|                    | <i>pabB</i>        | 0,250                          | 0,250     | 0,250     | 0,250     |           |           |              |          |  |
|                    | <i>polB</i>        | 0,223                          | 0,261     | 0,288     | 0,229     |           |           |              |          |  |
|                    | <i>putP</i>        | 0,179                          | 0,230     | 0,328     | 0,263     |           |           |              |          |  |
|                    | <i>trpA</i>        | 0,213                          | 0,269     | 0,275     | 0,243     |           |           |              |          |  |
|                    | <i>trpB</i>        | 0,234                          | 0,268     | 0,287     | 0,211     |           |           |              |          |  |
|                    | <i>UR</i>          | 0,246                          | 0,217     | 0,237     | 0,300     |           |           |              |          |  |
|                    | <i>HPI</i>         | 0,219                          | 0,283     | 0,284     | 0,214     |           |           |              |          |  |
|                    | <i>DR</i>          | 0,295                          | 0,246     | 0,253     | 0,206     |           |           |              |          |  |
|                    |                    | tv                             | ti        | tv        | tv        | ti        | tv        |              |          |  |
|                    |                    | a                              | b         | c         | d         | e         | f         |              |          |  |
|                    | model (2)          | <b>AC</b>                      | <b>AG</b> | <b>AT</b> | <b>CG</b> | <b>CT</b> | <b>TG</b> | <b>p-inv</b> | <b>G</b> |  |
| <b>6 genes (1)</b> | <b>GTR+I+G</b>     | 0,475                          | 4,075     | 1,082     | 0,999     | 5,042     | [1]       | 0,517        | 0,163    |  |
| <i>icd</i>         | <b>TIM1ef+I+G</b>  | 1,000                          | 2,754     | 1,839     | 1,839     | 10,270    | [1]       | 0,760        | 0,493    |  |
| <i>pabB</i>        | <b>TrNef+G</b>     | 1,000                          | 5,111     | 1,000     | 1,000     | 3,242     | [1]       |              | 0,062    |  |
| <i>polB</i>        | <b>GTR+G</b>       | 0,376                          | 5,786     | 0,887     | 0,922     | 3,655     | [1]       |              | 0,090    |  |
| <i>putP</i>        | <b>TrN+G</b>       | 1,000                          | 2,962     | 1,000     | 1,000     | 5,791     | [1]       |              | 0,108    |  |
| <i>trpA</i>        | <b>HKY+I</b>       | kappa = 5.643 (ti/tv = 2.799)  |           |           |           |           |           |              | 0,856    |  |
| <i>trpB</i>        | <b>GTR+G</b>       | 0,127                          | 3,186     | 1,171     | 1,011     | 4,814     | [1]       |              | 0,048    |  |
| <i>UR</i>          | <b>TrN+I</b>       | 1,000                          | 47,178    | 1,000     | 1,000     | 11,365    | [1]       | 0,926        |          |  |
| <i>HPI</i>         | <b>TPM1uf+I+G</b>  | 1,000                          | 4,954     | 0,605     | 0,605     | 4,954     | [1]       | 0,323        | 0,010    |  |
| <i>DR</i>          | <b>HKY</b>         | kappa = 5.6107 (ti/tv = 2.839) |           |           |           |           |           |              |          |  |

(1) *icd+pabB+polB+putP+trpA+trpB* concatenated

(2) following Posada's nomenclature (jModelTest: Phylogenetic Model Averaging. Mol. Biol. Evol., July 2008; 25: 1253 - 1256).
